# Supplementary material for: CHEM21 selection guide of classical- and less classical-solvents
Source: Royal Society of Chemistry journal article supplement (doi:10.1039/c5gc01008j), 2015-08-13
Supplement: c5gc01008j1.xlsx [file c5gc01008j1.xlsx]

## Sheet: Results 
		CAS	Safety	Health	Environment			Reach	Ranking by default
	Solvents
	p-Cymene	99-87-6	4	5	5			no	Problematic
	Turpentine	8006-64-2	4	2	7			full registration	Problematic
	Limonene	5989-27-5	4	6	7			full registration	Problematic
	Ethanol	64-17-5	4	3	3			full registration	Recommended
	n-Butanol	71-36-3	3	4	3			full registration	Recommended
	iso-Butanol	78-83-1	3	4	3			full registration	Recommended
	PEG-400	25322-68-3	2	2	7			full registration	Problematic
	PPG-425	25322-69-4	2	1	7			full registration	Problematic
	Glycerol	56-81-5	1	1	7			full registration	Problematic
	1,3-Propanediol	504-63-2	1	1	7			full registration	Problematic
	Acetone	67-64-1	5	3	5			full registration	Problematic
	2-Butanone	78-93-3	5	3	3			full registration	Recommended
	isoamyl alcohol	123-51-3	3	2	3			full registration	Recommended
	Ethyl Acetate	141-78-6	5	3	3			full registration	Recommended
	Butyl Acetate	123-86-4	4	2	3			full registration	Recommended
	Diethyl succinate	123-25-1	1	5	7			no	Problematic
	γ-Valerolactone	108-29-2	1	5	7			no	Problematic
	FAMEs (methyl oleate)	112-62-9	1	5	7			no	Problematic
	Glycol diacetate	111-55-7	1	1	5			full registration	Recommended
	Isoamyl acetate	123-92-2	3	2	5			full registration	Recommended
	Dibutyl succinate	141-03-7	1	5	7			no	Problematic
	2-Methyl-THF	96-47-9	6	7	3			full registration	Problematic
	ETBE	637-92-3	7	3	3			full registration	Problematic
	TAME	994-05-8	6	2	3			full registration	Recommended
	TBME	1634-04-4	8	3	5			full registration	Hazardous
	CPME	5614-37-9	7	2	5			full registration	Problematic
	Dimethyl isosorbide	5306-85-4	2	5	5			no	Problematic
	1,2,3-trimethoxy-propane	20637-49-4	4	5	5			no	Problematic
	Dimethyl carbonate	616-38-6	4	1	3			full registration	Recommended
	Ethylene carbonate	96-49-1	1	2	7			full registration	Problematic
	Propylene carbonate	108-32-7	1	2	7			full registration	Problematic
	Dimethylethylene urea	80-73-9	1	6	7			full registration	Problematic
	Dimethylpropylene urea	7226-23-5	1	6	7			full registration	Problematic
	Cyrene	53716-82-8	1	2	7			full registration	Problematic
	Sulpholane	126-33-0	1	9	7			full registration	Hazardous
	Ethyl lactate	687-47-8	3	4	5			full registration	Problematic
	Tetrahydrofurfuryl alcohol	97-99-4	1	6	5			full registration	Problematic
	Lactic acid	50-21-5	1	4	7			full registration	Problematic
	solvent name	0	5	6	7			no	Problematic
	solvent name	0	5	6	7			no	Problematic
	solvent name	0	5	6	7			no	Problematic
	solvent name	0	5	6	7			no	Problematic
	solvent name	0	5	6	7			no	Problematic
	solvent name	0	5	6	7			no	Problematic
	solvent name	0	5	6	7			no	Problematic
	solvent name	0	5	6	7			no	Problematic
	solvent name	0	5	6	7			no	Problematic
	solvent name	0	5	6	7			no	Problematic
	solvent name	0	5	6	7			no	Problematic

## Sheet: solvent data sheet
		CAS #							Safety															Health
				red 3	yellow 2	green 1	yellow 2	red 3		1	3	4	5	7		0	1		green	red		green	red	Green 1	Green 2	2	2	2	2	2	2	2	2	2	2	2	2	green 2 total	Yello 4	4	yellow 4 total	Yellow 5	Yellow 6	6	6	6	6	6	6
Category	Solvents		BP	<50	50-69	70-139	140-200	>200	flash point	>60	24-60	0-23	0 to -20	<-20	ignition temp	>200	<200	peroxability			resistivity	> 10^8 W.m	< 10^8 W.m	No code - tested	H302 – Harmful if swallowed.	H304 - May be fatal if swallowed and enters airways	H312 – Harmful in contact with skin.	H315 – Causes skin irritation.	H317 – May cause an allergic skin reaction.	H319 – Causes serious eye irritation.	H332 – Harmful if inhaled.	H335 – May cause respiratory irritation.	H336 – May cause drowsiness or dizziness.	H371 – May cause damage to organs .	H373 – May cause damage to organs through prolonged or repeated exposure.	EUH070 - Toxic by eye contact	EUH066 - Repeated exposure may cause skin dryness or cracking		H334 – May cause allergy or asthma symptoms or breathing difficulties if inhaled.	H318 – Causes serious eye damage.		No code - not tested	H301 – Toxic if swallowed.	H311 – Toxic if contact with skin.	H331 – Toxic if inhaled.	H341 – Suspected of causing genetic defects .	H351 – Suspected of causing cancer.	H361 – Suspected of damaging fertility or the unborn child .	H370 – Causes damage to organs .
Hydrocarbon	p-Cymene	99-87-6	177	0	0	0	5	0	47	0	3	0	0	0	436	0	0	n	0	0	y	0	1	0		1		1		1		1						4			0	1
	Turpentine	8006-64-2	160	0	0	0	5	0	35	0	3	0	0	0	253	0	0	n	0	0	y	0	1	0	1	1	1	1	1	1	1							7			0	0
	Limonene	5989-27-5	175	0	0	0	5	0	48	0	3	0	0	0	255	0	0	n	0	0	y	0	1	0		1		1	1									3			0	0	1	1	1				1
Alcohols	Ethanol	64-17-5	78	0	0	3	0	0	12	0	0	4	0	0	363	0	0	n	0	0	n	0	0	0						1								1			0	0
	n-Butanol	71-36-3	118	0	0	3	0	0	37	0	3	0	0	0	343	0	0	n	0	0	n	0	0	0	1			1				1	1					4		1	1	0
	iso-Butanol	78-83-1	107	0	0	3	0	0	28	0	3	0	0	0	405	0	0	n	0	0	n	0	0	0				1				1	1					3		1	1	0
	PEG-400	25322-68-3	high	0	0	0	0	7	227	1	0	0	0	0	305	0	0	y	0	1	n	0	0	0								1						1			0	0
	PPG-425	25322-69-4	high	0	0	0	0	7	113	1	0	0	0	0	high?	0	0	y	0	1	n	0	0	1														0			0	0
	Glycerol	56-81-5	290	0	0	0	0	7	177	1	0	0	0	0	370	0	0	n	0	0	n	0	0	1														0			0	0
	1,3-Propanediol	504-63-2	214	0	0	0	0	7	140	1	0	0	0	0	400	0	0	n	0	0	n	0	0	1														0			0	0
Ketones	Acetone	67-64-1	56	0	5	0	0	0	-18	0	0	0	5	0	525	0	0	n	0	0	n	0	0	0						1			1				1	3			0	0
	2-Butanone	78-93-3	80	0	0	3	0	0	-2	0	0	0	5	0	404	0	0	n	0	0	n	0	0	0						1			1				1	3			0	0
	isoamyl alcohol	123-51-3	131	0	0	3	0	0	43	0	3	0	0	0	335	0	0	n	0	0	n	0	0	0				1		1	1	1					1	5			0	0
Esters	Ethyl Acetate	141-78-6	77	0	0	3	0	0	-4	0	0	0	5	0	427	0	0	n	0	0	n	0	0	0						1			1				1	3			0	0
	Butyl Acetate	123-86-4	126	0	0	3	0	0	22	0	0	4	0	0	420	0	0	n	0	0	n	0	0	0									1				1	2			0	0
	Diethyl succinate	123-25-1	218	0	0	0	0	7	91	1	0	0	0	0	high?	0	0	n	0	0	n	0	0	0														0			0	1
	γ-Valerolactone	108-29-2	207	0	0	0	0	7	96	1	0	0	0	0	high?	0	0	n	0	0	n	0	0	0														0			0	1
	FAMEs (methyl oleate)	112-62-9	318	0	0	0	0	7	180	1	0	0	0	0	high?	0	0	n	0	0	n	0	0	0														0			0	1
	Glycol diacetate	111-55-7	187	0	0	0	5	0	86	1	0	0	0	0	482	0	0	n	0	0	n	0	0	1														0			0	0
	Isoamyl acetate	123-92-2	142	0	0	0	5	0	25	0	3	0	0	0	360	0	0	n	0	0	n	0	0	0													1	1			0	0
	Dibutyl succinate	141-03-7	278	0	0	0	0	7	135	1	0	0	0	0	high?	0	0	n	0	0	n	0	0	0														0			0	1
Ethers	2-Methyl-THF	96-47-9	78	0	0	3	0	0	-12	0	0	0	5	0	270	0	0	y	0	1	n	0	0	0				1										1		1	1	0	1
	ETBE	637-92-3	70	0	0	3	0	0	-19	0	0	0	5	0	375	0	0	y	0	1	y	0	1	0									1					1			0	0
Ketones	TAME	994-05-8	86	0	0	3	0	0	-7	0	0	0	5	0	345	0	0	n	0	0	y	0	1	0	1								1					2			0	0
	TBME	1634-04-4	55	0	5	0	0	0	-28	0	0	0	0	7	460	0	0	n	0	0	y	0	1	0				1										1			0	0
	CPME	5614-37-9	106	0	0	3	0	0	-1	0	0	0	5	0	180	0	1	n	0	0	y	0	1	0	1			1		1								3			0	0
	Dimethyl isosorbide	5306-85-4	95	0	0	3	0	0	108	1	0	0	0	0	high?	0	0	n	0	0	y	0	1	0														0			0	1
	1,2,3-trimethoxy-propane	20637-49-4	143	0	0	0	5	0	43	0	3	0	0	0	high?	0	0	n	0	0	y	0	1	0														0			0	1
Dipolar aprotic	Dimethyl carbonate	616-38-6	90	0	0	3	0	0	16	0	0	4	0	0	458	0	0	n	0	0	n	0	0	1														0			0	0
	Ethylene carbonate	96-49-1	248	0	0	0	0	7	143	1	0	0	0	0	465	0	0	n	0	0	n	0	0	0	1					1					1			3			0	0
	Propylene carbonate	108-32-7	242	0	0	0	0	7	132	1	0	0	0	0	455	0	0	n	0	0	n	0	0	0						1								1			0	0
	Dimethylethylene urea	80-73-9	225	0	0	0	0	7	95	1	0	0	0	0	305	0	0	n	0	0	n	0	0	0	1										1			2		1	1	0						1
	Dimethylpropylene urea	7226-23-5	247	0	0	0	0	7	110	1	0	0	0	0	255	0	0	n	0	0	n	0	0	0	1													1		1	1	0						1
	Cyrene	53716-82-8	203	0	0	0	0	7	61	1	0	0	0	0	high?	0	0	n	0	0	n	0	0	0						1								1			0	0
	Sulpholane	126-33-0	287	0	0	0	0	7	177	1	0	0	0	0	high?	0	0	n	0	0	n	0	0	0	1													1			0	0
Multifunctional	Ethyl lactate	687-47-8	155	0	0	0	5	0	47	0	3	0	0	0	400	0	0	n	0	0	n	0	0	0								1						1		1	1	0
	Tetrahydrofurfuryl alcohol	97-99-4	178	0	0	0	5	0	75	1	0	0	0	0	282	0	0	n	0	0	n	0	0	0						1								1			0	0						1
	Lactic acid	50-21-5	230	0	0	0	0	7	113	1	0	0	0	0	high?	0	0	n	0	0	n	0	0	0				1										1		1	1	0
																							0
New solvents	solvent name			7	0	0	0	0		0	0	4	0	0		0	1		0	0		0	0	0														0			0	1
	solvent name			7	0	0	0	0		0	0	4	0	0		0	1		0	0		0	0	0														0			0	1
	solvent name			7	0	0	0	0		0	0	4	0	0		0	1		0	0		0	0	0														0			0	1
	solvent name			7	0	0	0	0		0	0	4	0	0		0	1		0	0		0	0	0														0			0	1
	solvent name			7	0	0	0	0		0	0	4	0	0		0	1		0	0		0	0	0														0			0	1
	solvent name			7	0	0	0	0		0	0	4	0	0		0	1		0	0		0	0	0														0			0	1
	solvent name			7	0	0	0	0		0	0	4	0	0		0	1		0	0		0	0	0														0			0	1
	solvent name			7	0	0	0	0		0	0	4	0	0		0	1		0	0		0	0	0														0			0	1
	solvent name			7	0	0	0	0		0	0	4	0	0		0	1		0	0		0	0	0														0			0	1
	solvent name			7	0	0	0	0		0	0	4	0	0		0	1		0	0		0	0	0														0			0	1
	solvent name			7	0	0	0	0		0	0	4	0	0		0	1		0	0		0	0	0														0			0	1
[truncated: 59 more columns]

## Sheet: user guide
		CAS #							Safety															Health
				red 3	yellow 2	green 1	yellow 2	red 3		1	3	4	5	7		0	1		green	red		green	red	Green 1	Green 2	2	2	2	2	2	2	2	2	2	2	2	2	green 2 total	Yellow 4	4	yellow 4 total	Yellow 5	Yellow 6	6	6	6	6	6	6
Category	Solvents		BP	<50	50-69	70-139	140-199	>200	flash point	>60	24-60	0-23	0 - -20	<-20	ignition temp	>200	<200	peroxability			resistivity	> 10^8 W.m	< 10^8 W.m	No code - tested	H302 – Harmful if swallowed.	H304 - May be fatal if swallowed and enters airways	H312 – Harmful in contact with skin.	H315 – Causes skin irritation.	H317 – May cause an allergic skin reaction.	H319 – Causes serious eye irritation.	H332 – Harmful if inhaled.	H335 – May cause respiratory irritation.	H336 – May cause drowsiness or dizziness.	H371 – May cause damage to organs .	H373 – May cause damage to organs through prolonged or repeated exposure exposure cause the hazard>.	EUH070 - Toxic by eye contact	EUH066 - Repeated exposure may cause skin dryness or cracking		H334 – May cause allergy or asthma symptoms or breathing difficulties if inhaled.	H318 – Causes serious eye damage.		No code - not tested	H301 – Toxic if swallowed.	H311 – Toxic in contact with skin.	H331 – Toxic if inhaled.	H341 – Suspected of causing genetic defects .	H351 – Suspected of causing cancer .	H361 – Suspected of damaging fertility or the unborn child .	H370 – Causes damage to organs .
Hydrocarbon	p-Cymene	99-87-6	177	0	0	0	5	0	47	0	3	0	0	0	436	0	0	n	0	0	y	0	1	0														0			0	1
	Turpentine	8006-64-2	160	0	0	0	5	0	35	0	3	0	0	0	253	0	0	n	0	0	y	0	1	0	1	1	1	1	1	1	1							7			0	0
	Limonene	5989-27-5	175	0	0	0	5	0	48	0	3	0	0	0	255	0	0	n	0	0	y	0	1	0				1	1									2			0	0
New solvents	solvent name			7	0	0	0	0		0	0	4	0	0		0	1		0	0		0	0	0														0			0	1
[truncated: 59 more columns]
